# Supplementary material for: Stacking of purines in water: the role of dipolar interactions in caffeine
Source: Royal Society of Chemistry journal article supplement (doi:10.1039/c5cp07326j), 2016-01-01
Supplement: c5cp07326j1.pdf [file c5cp07326j1.pdf]

## Electronic Supplementary Information

### Stacking of purines in water: the role of dipolar interaction in caffeine

L. Tavagnacco<sup>ab</sup>, S. Di Fonzo<sup>a\*</sup>, F. D'Amico<sup>a</sup>, C. Masciovecchio<sup>a</sup>, J. W. Brady<sup>c</sup>, A. Cesàro<sup>ab</sup>

*<sup>a</sup>Elettra-Sincrotrone Trieste S.C.p.A., Strada Statale 14 Km 163.5, Area Science Park,  
I-34149 Trieste, Italy*

*<sup>b</sup>Lab. of Physical and Macromolecular Chemistry, Department of Chemical and Pharmaceutical  
Sciences, University of Trieste, via L. Giorgieri 1, 34127 Trieste, Italy*

*<sup>c</sup>Department of Food Science, Stocking Hall,  
Cornell University, Ithaca, New York, 14853, USA*

*\*Corresponding author: Silvia di Fonzo*

*Elettra-Sincrotrone Trieste S.C.p.A., Strada Statale 14 Km 163.5, Area Science Park,  
I-34149 Trieste, Italy*

*Tel +39-040-375-8816*

*e-mail: [silvia.difonzo@elettra.eu](mailto:silvia.difonzo@elettra.eu)*

**Table S1** Experimental wavenumbers from isotropic Raman data (at incident wavelength  $\lambda=266\text{nm}$  and  $\lambda=532\text{ nm}$ ) for caffeine aqueous solutions at a concentration 1m and T=353 K. Simulation results: wavenumbers ( $\text{cm}^{-1}$ ), IR Intensity, Raman Activity and their tentative vibrational assignments. Only wavenumbers for IR intensities and Raman activities  $>1$  have been reported. In the assignment  $\nu$  stands for a stretching mode,  $\rho$  for a rocking mode and  $\delta$  for a bending mode.

| Raman experiment     |        | Results of simulations                            |           |          | Assignment |                                                                                                                  |
|----------------------|--------|---------------------------------------------------|-----------|----------|------------|------------------------------------------------------------------------------------------------------------------|
| Isotropic profile    |        | opt mp2/6-311++g(d,p), freq b3lyp/6-311++g(2d,2p) |           |          |            |                                                                                                                  |
| Caffeine 1m, T=353 K |        | wavenumbers                                       | IR        | Raman    |            |                                                                                                                  |
| 266. nm              | 532 nm | ( $\text{cm}^{-1}$ )                              | Intensity | Activity |            |                                                                                                                  |
| 1                    | 1031   | 1034                                              | 1036      | 80.2     | 3.9        | $\rho(\text{C1M}) + \nu(\text{N3-C3M}) + \nu(\text{C6-N1-C2}) + \delta(\text{C8-H8})$                            |
| 2                    | 1078   | 1079                                              | 1089      | 1.8      | 11.6       | $\rho(\text{C1M}, \text{C3M}, \text{C7M}) + \delta(\text{N-CH}) + \nu(\text{C8-N7})$                             |
| 3                    | 1192   | -                                                 | 1209      | 18.9     | 1.7        | $\delta(\text{N-CH}) + \rho(\text{C3M}) + \nu(\text{N1-C1M}) + \nu(\text{N7-C7M})$                               |
| 4                    | 1246   | 1241                                              | 1252      | 81.5     | 24         | $\delta(\text{CH-N}) + \rho(\text{C1M}, \text{C3M}, \text{C7M})$                                                 |
| 5                    | 1258   | 1256                                              | 1265      | 17.2     | 15.3       | $\nu(\text{C-N}) + \rho(\text{C1M}, \text{C3M}, \text{C7M})$                                                     |
| 6                    | 1291   | 1291                                              | 1287      | 24.9     | 16.1       | $\nu(\text{C-N}) + \nu(\text{C-C})$ in both rings + $\rho(\text{C3M})$                                           |
| 7                    | 1333   | 1332                                              | 1335      | 13.4     | 71.6       | $\nu(\text{imidazole ring})$                                                                                     |
| 8                    | 1363   | 1362                                              | 1372      | 94.1     | 18.5       | $\nu(\text{C-N}) + \delta(\text{C1M}, \text{C3M}, \text{C7M})$                                                   |
| 9                    | 1393   | 1395                                              | -         | -        | -          | -                                                                                                                |
| 10                   | 1409   | 1406                                              | 1405      | 18.1     | 2.4        | $\nu(\text{imidazole ring}) + \nu(\text{CN}) + \delta(\text{C1M}, \text{C3M}, \text{C7M}) + \delta(\text{C8H8})$ |
| 11                   | 1437   | 1439                                              | 1440      | 106.5    | 23         | $\delta(\text{C1M}, \text{C3M}, \text{C7M}) + \delta(\text{C8H8}) + \nu(\text{C-N})$                             |
|                      |        |                                                   | 1456      | 21.3     | 5.4        |                                                                                                                  |
|                      |        |                                                   | 1468      | 11.1     | 3.2        |                                                                                                                  |
|                      |        |                                                   | 1484      | 98.7     | 3.6        |                                                                                                                  |
|                      |        |                                                   | 1487      | 24.3     | 8.8        |                                                                                                                  |
| 12                   | 1492   | 1497                                              | 1499      | 16.4     | 9.7        | $\delta(\text{C1M}, \text{C3M}, \text{C7M}) + \nu(\text{C-N})$                                                   |
|                      |        |                                                   | 1501      | 12.34    | 7.96       |                                                                                                                  |
|                      |        |                                                   | 1518      | 7.83     | 9.27       |                                                                                                                  |
|                      |        |                                                   | 1519      | 5.98     | 12.00      |                                                                                                                  |
|                      |        |                                                   | 1521      | 16.98    | 2.6        |                                                                                                                  |
| 13                   | 1552   | 1549                                              | 1569      | 117.4    | 1.8        | $\nu(\text{pyrimidine ring}) + \delta(\text{C1M}, \text{C3M}, \text{C7M})$                                       |
| 14                   | 1601   | 1598                                              | 1590      | 97.2     | 50.3       | $\nu(\text{C=C}) + \nu(\text{C-N}) + \delta(\text{C1M}, \text{C3M}, \text{C7M})$                                 |
| 15                   | 1642   | 1647                                              | 1672      | 845      | 30.4       | $\nu(\text{C=O})$ out of phase + $\nu(\text{C C})$                                                               |
| 16                   | 1697   | 1692                                              | 1715      | 424.3    | 52.5       | $\nu(\text{C=O})$ in phase                                                                                       |

**Table S2** Optimized geometrical parameters of caffeine obtained by Moller-Plesset (MP2) perturbation theory and 6-311++G(d,p) basis set. This optimization was used as input for calculation of the Raman normal modes.

| Center<br>Number | Atomic<br>Number | Coordinates (Angstroms) |           |           |
|------------------|------------------|-------------------------|-----------|-----------|
|                  |                  | X                       | Y         | Z         |
| 1                | 7                | -1.296082               | -2.066270 | -0.011430 |
| 2                | 6                | -0.348404               | -1.092988 | -0.050456 |
| 3                | 6                | 1.853390                | -0.172217 | -0.008286 |
| 4                | 8                | 3.066454                | -0.284688 | 0.103729  |
| 5                | 7                | 1.016742                | -1.272296 | -0.113852 |
| 6                | 6                | 1.603844                | -2.601014 | 0.046925  |
| 7                | 1                | 1.869437                | -2.783342 | 1.092384  |
| 8                | 1                | 0.863627                | -3.330533 | -0.279891 |
| 9                | 1                | 2.503019                | -2.662364 | -0.565284 |
| 10               | 7                | 1.242681                | 1.099333  | -0.090096 |
| 11               | 6                | 2.172281                | 2.231172  | -0.023257 |
| 12               | 1                | 2.579968                | 2.335410  | 0.985293  |
| 13               | 1                | 1.616822                | 3.127247  | -0.293332 |
| 14               | 1                | 2.991660                | 2.054559  | -0.718927 |
| 15               | 6                | -0.135796               | 1.386111  | -0.007792 |
| 16               | 8                | -0.579613               | 2.528266  | 0.068280  |
| 17               | 6                | -0.909480               | 0.175249  | -0.059886 |
| 18               | 7                | -2.267047               | -0.028070 | 0.012453  |
| 19               | 6                | -3.304449               | 0.997955  | 0.023792  |
| 20               | 1                | -4.268740               | 0.497905  | 0.127735  |
| 21               | 1                | -3.140128               | 1.677378  | 0.860273  |
| 22               | 1                | -3.276732               | 1.564934  | -0.907811 |
| 23               | 6                | -2.444172               | -1.380302 | 0.025878  |
| 24               | 1                | -3.430991               | -1.822497 | 0.062448  |

For the plot of the simulated Raman profile in figure 2, a Gaussian band shape function with a bandwidth (FWHM) of 5 cm<sup>-1</sup> was used for the broadening. During this procedure, the Raman activities (S<sub>i</sub>) calculated with the Gaussian 09 were converted to relative Raman Intensities (I<sub>i</sub>) using the following relationship derived from the theory of Raman scattering<sup>1</sup>:

$$I_{i=} \frac{A(\nu_0 - \nu_i)^4 S_i}{\nu_i \left[ 1 - \exp\left(-\frac{h\nu_i}{kT}\right) \right]} \quad [1]$$

where  $\nu_0$  is the excitation frequency (in cm<sup>-1</sup> units),  $\nu_i$  is the vibrational wavenumber of the *i*th normal mode, *h* is the Planck constant, *c* is the speed of light, *k* is the Boltzmann constant and *A* is a common normalization factor for all peak intensities.



## Data analysis and fitting

The scattered light from the sample, polarized parallel ( $I_{\parallel}$ ) and perpendicular ( $I_{\perp}$ ) with respect to the incident radiation, was collected. Isotropic and anisotropic Raman intensity profiles were obtained according to the relation:

$$I_{iso} = I_{\parallel} - 4/3 I_{\perp} \text{ and } I_{aniso} = I_{\perp} \quad [2]$$

The isotropic Raman spectral lines were fitted by a Kubo Anderson function (KAF).<sup>2</sup> Under this framework, the isotropic spectral shape for N vibrations can be represented by

$$I_{iso} = \sum_{i=1}^N A_i K_i(\omega, \omega_{0,i}, \sigma_i^2, \alpha_i) + B \quad [3]$$

where B is a constant background,  $A_i$  are scaling factors, and  $K_i(\omega, \omega_{0,i}, \sigma_i^2, \alpha_i)$  is the KAF which can be expressed by the following equation

$$K_i(\omega, \omega_{0,i}, \sigma_i^2, \alpha_i) = \frac{e^{-\alpha_i^2}}{\sigma_i} \sum_{n=0}^{\infty} \frac{(-\alpha_i^2)^n}{n!} \frac{\alpha_i + n/\alpha_i}{(\alpha_i + n/\alpha_i)^2 + \frac{(\omega - \omega_{0,i})^2}{\sigma_i^2}} \quad [4]$$

where  $\sigma_i^2$  is the frequency second moment and its square root describes the frequency distribution of the active oscillator around the unperturbed frequency  $\omega_{0,i}$  and  $\alpha_i = \sigma_i \tau_{c,i}$  is a parameter which describes the modulation regime of the dephasing correlation time<sup>3</sup> and  $\tau_{c,i}$  is the environmental modulation time of the perturbative events. This model predicts that if  $\alpha \ll 1$ , the modulation of the probe molecule is fast compared to the molecular perturbations of the system in which is embedded, and the original phase of the modulation is kept unaltered for a long time. In this particular case the KAF equation reduces to a Lorentzian function. Under these circumstances the vibrational dephasing relaxation time,  $\tau_{vibr}$ , and the reorientational relaxation time  $\tau_{reor}$ , can be calculated as:

$$\tau_{vibr} \cong \frac{1}{\sigma^2 \tau_c} = \frac{1}{\pi c \Gamma_{iso}} \quad [5a]$$

$$\tau_{reor} \cong \frac{1}{\pi c (\Gamma_{aniso} - \Gamma_{iso})} \quad [5b]$$

where  $c$  is the speed of light and  $\Gamma_i$  ( $i=iso, aniso$ ) is the full width at half maximum of the Lorentzian for isotropic and anisotropic intensity modes, respectively.

The non coincidence effect, NCE, is defined as the non-coincidence of the position of the maxima of the isotropic and anisotropic Raman components:

$$\Delta \nu_{NCE} = \nu_{aniso} - \nu_{iso} \quad [6]$$

where  $\nu_{aniso}$  and  $\nu_{iso}$  are the normal mode peak frequency position obtained by fitting respectively the anisotropic and isotropic Raman profile with the above described procedure.

**Figure S1** Isotropic spectra of caffeine aqueous solutions collected off-resonance (blue-lines) and on-resonance (pink lines, data at about 1550  $\text{cm}^{-1}$  are affected by an experimental laser satellite artifact and therefore are omitted). On the top they are displayed the spectra recorded on 1m caffeine aqueous solutions at 353 K. The high sensitivity of the resonance Raman scattering is shown in the panels at the bottom where extremely diluted solutions were measured at room temperature (0.01 m acquired at 532 nm, 0.0022 m acquired at 266 nm).

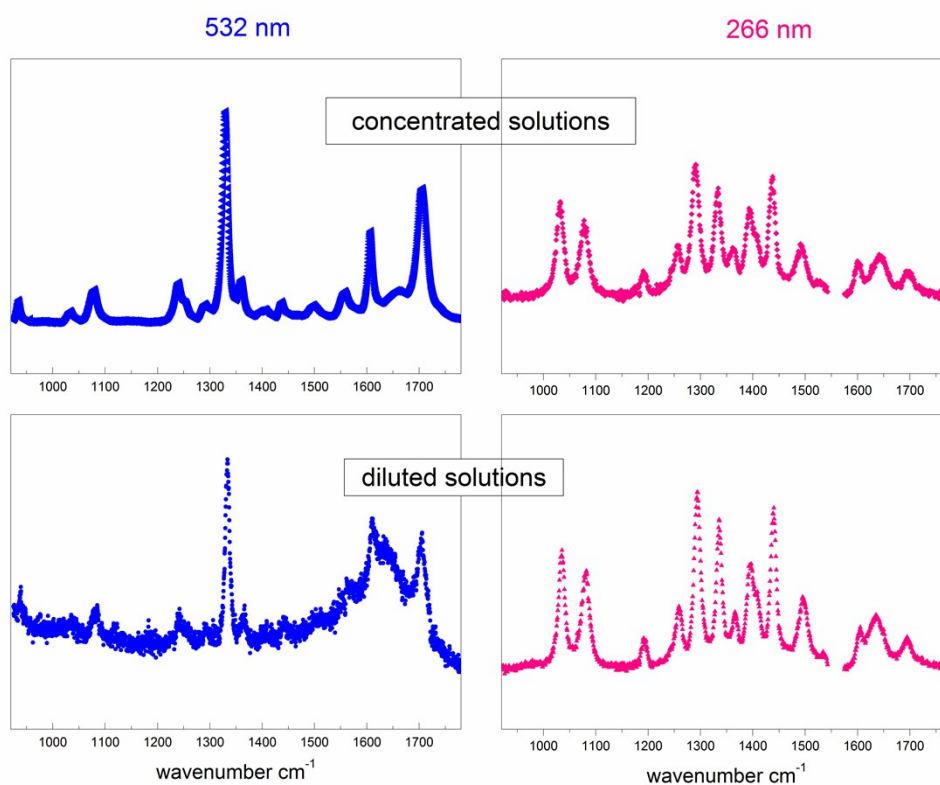



**Figure S2** Concentration dependence of the isotropic peak position for the normal modes associated to: (top left) rocking C1M, stretching N3-C3M, stretching C6-N1-C2, bending C8-H8; (top right) rocking of the methyl groups, bending of the N-CH atoms and stretching of the C8-N7; (middle left) stretching of both the caffeine ring atoms; (middle right) stretching of the imidazole ring atoms; (bottom) in phase carbonyl stretching. Results obtained at 300K are displayed in light-blue, whereas results at 353K are reported in red.

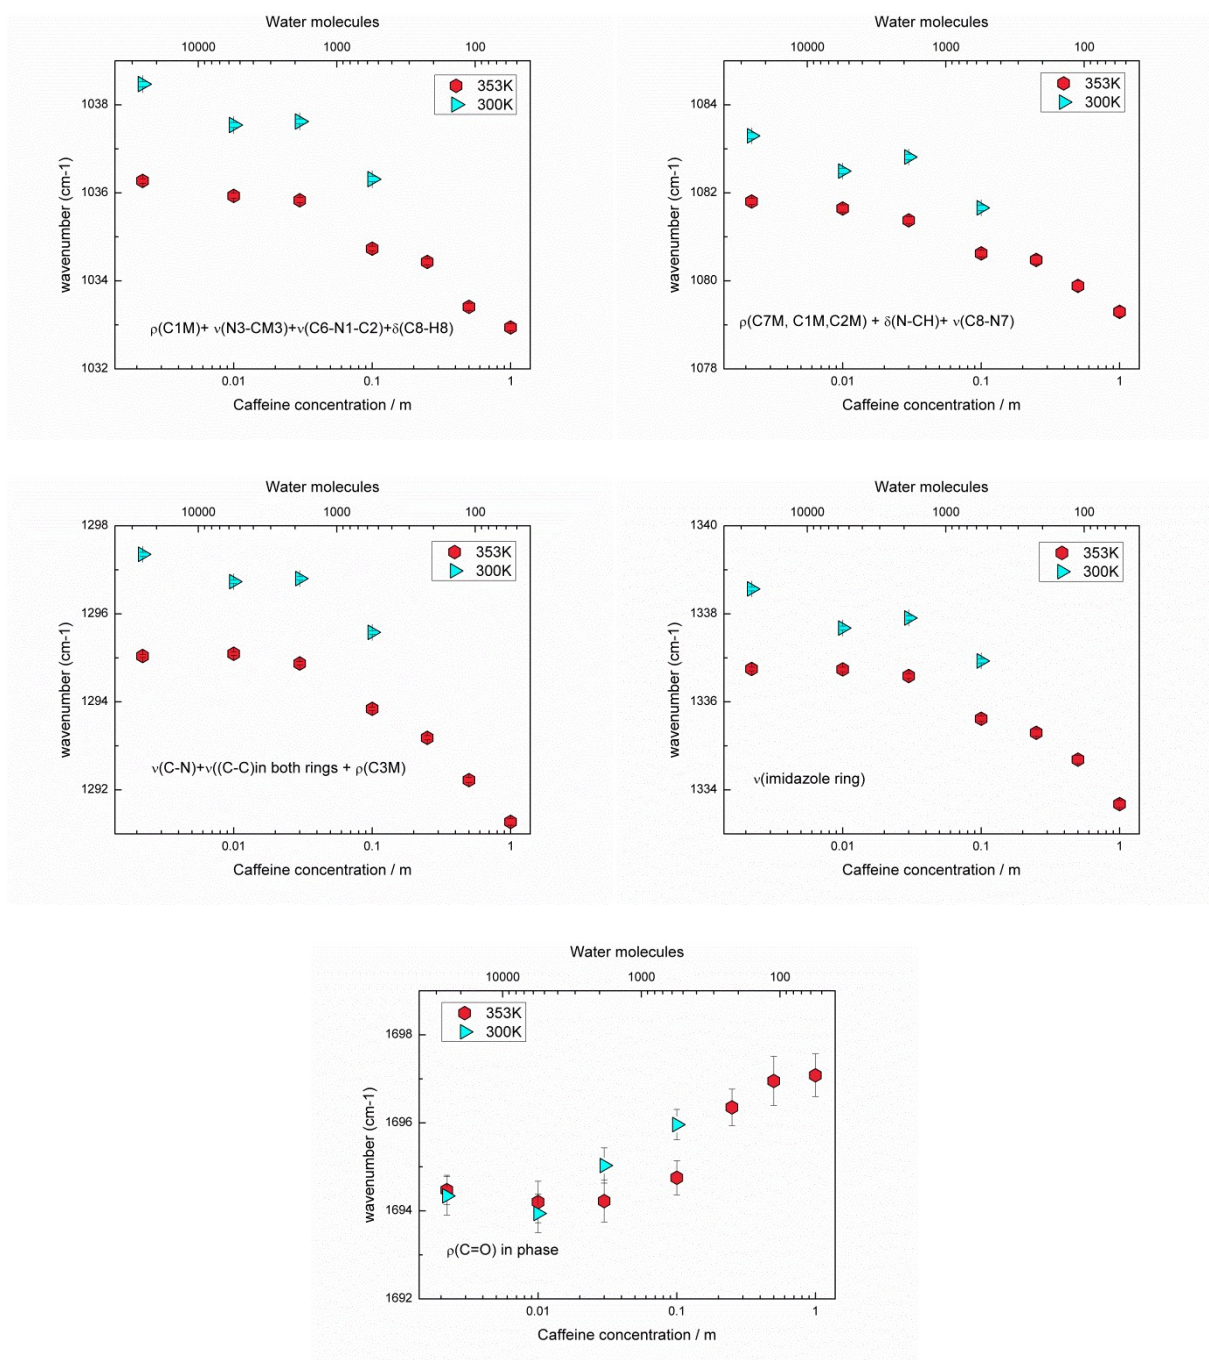

**Figure S3** Experimental anisotropic and isotropic spectra in the frequency region of the totally symmetric breathing mode of the purine ring,  $\nu_{\text{rings}}$ , and in that of the bending mode of methyl groups of caffeine,  $\delta(\text{CM})$ . Anisotropic Raman spectra are displayed in red, whereas isotropic are in blue: a) 1 m caffeine aqueous solution at 353 K; b) 0.5 m caffeine aqueous solution at 353 K; c) 0.25 m caffeine aqueous solution at 353 K (dots: experimental data points; lines: fitting curves).

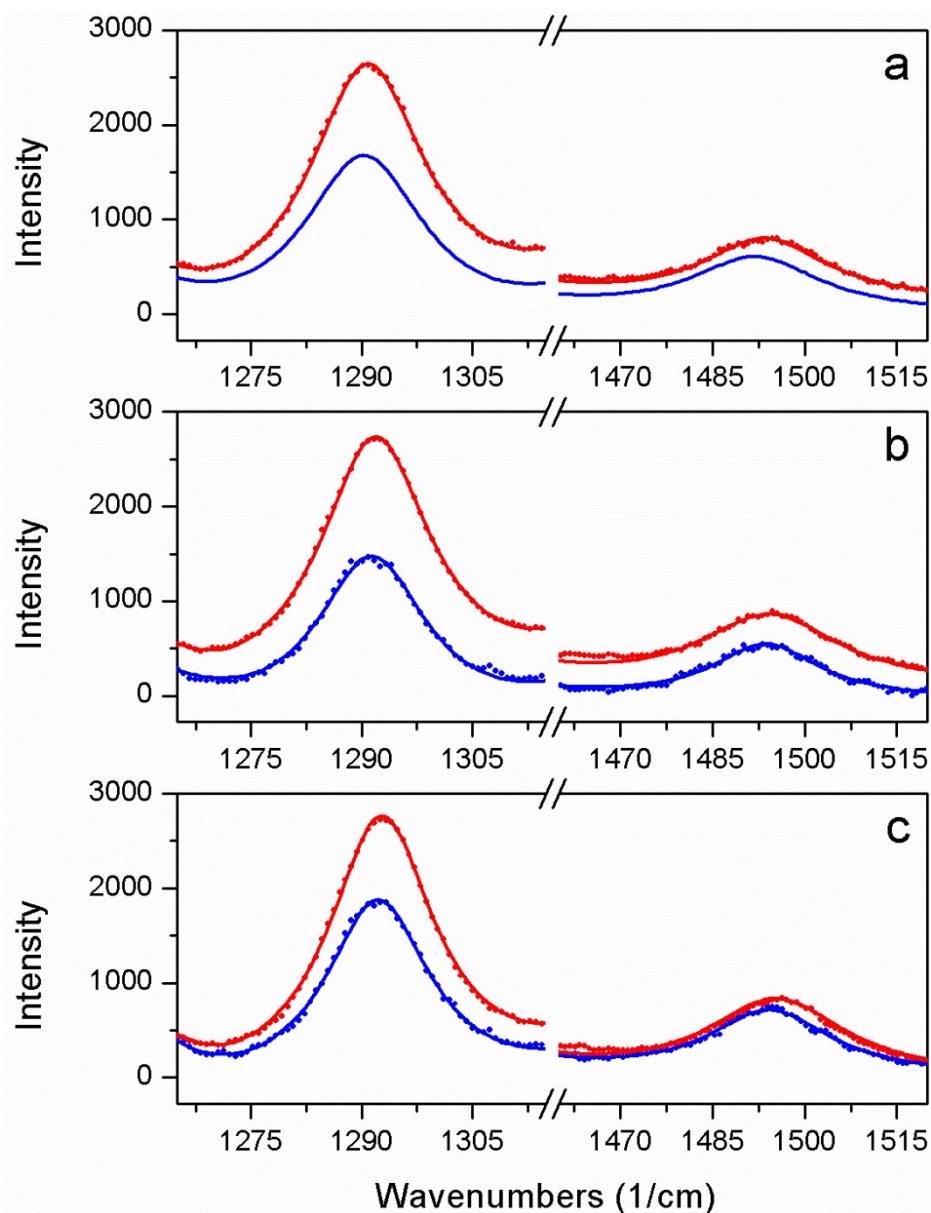

**Figure S4** Optimized caffeine dimers structures. a) Parallel dimer, with a total dipole moment vector of  $\sim 6.76$  D; b) Antiparallel dimer with a null total dipole moment vector. These optimized geometries were used as input for calculation of the Raman normal modes.

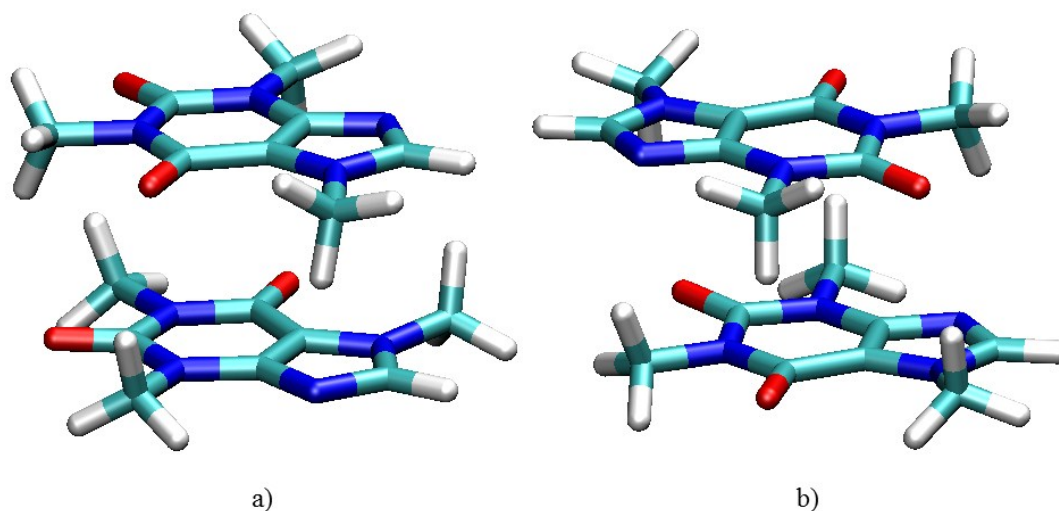

**Table S3** Simulation results for the two caffeine dimers configurations, i.e. antiparallel and parallel. Wavenumbers ( $\text{cm}^{-1}$ ), total Raman activity ( $S_{\text{tot}}$ ), depolarization ratio ( $\rho$ ), IR intensity, isotropic Raman activity ( $S_{\text{iso}}$ ), anisotropic Raman activity ( $S_{\text{aniso}}$ ) and frequency splitting of the coupled modes are reported. Isotropic and anisotropic Raman activities were calculated from the total Raman activity and the depolarization ratio using the expressions reported in Ref. 4. Vibrational normal modes for which it has been measured experimentally a significant NCE are highlighted.

| <i>ANTIPARALLEL DIMER</i> |                                 |                  |        |          |                  |                    |                               |
|---------------------------|---------------------------------|------------------|--------|----------|------------------|--------------------|-------------------------------|
|                           | Wavenumbers<br>$\text{cm}^{-1}$ | $S_{\text{tot}}$ | $\rho$ | IR       | $S_{\text{iso}}$ | $S_{\text{aniso}}$ | Splitting<br>$\text{cm}^{-1}$ |
| 1                         | 1030.16                         | 5.1713           | 0.4674 | 9.00E-04 | 1.33E+00         | 3.84E+00           | 4.4                           |
|                           | 1034.56                         | 1.00E-04         | 0.6527 | 89.3539  | 7.85E-06         | 9.22E-05           |                               |
| 2                         | 1079.92                         | 3.4909           | 0.347  | 7.00E-04 | 1.39E+00         | 2.10E+00           | 0.68                          |
|                           | 1080.60                         | 0.0096           | 0.3385 | 0.1717   | 3.94E-03         | 5.66E-03           |                               |
| 3                         | 1209.11                         | 4.373            | 0.7271 | 0.1191   | 7.73E-02         | 4.30E+00           | 0.47                          |
|                           | 1209.58                         | 0.024            | 0.7173 | 21.6094  | 6.09E-04         | 2.34E-02           |                               |
| 4                         | 1255.27                         | 10.5653          | 0.2264 | 0.126    | 6.01E+00         | 4.55E+00           | 1.3                           |
|                           | 1256.57                         | 0.0092           | 0.2465 | 148.2726 | 4.95E-03         | 4.25E-03           |                               |
| 5                         | 1271.16                         | 0.2436           | 0.6884 | 3.222    | 1.19E-02         | 2.32E-01           | 0.36                          |
|                           | 1271.52                         | 15.3091          | 0.6953 | 0.0429   | 6.59E-01         | 1.47E+01           |                               |
| 6                         | 1291.34                         | 18.7578          | 0.5586 | 0.0098   | 3.07E+00         | 1.57E+01           | 1.89                          |
|                           | 1293.23                         | 0.0034           | 0.5606 | 42.0974  | 5.50E-04         | 2.85E-03           |                               |

|    |         |          |        |           |          |          |       |
|----|---------|----------|--------|-----------|----------|----------|-------|
| 7  | 1343.32 | 40.9999  | 0.1701 | 0.0139    | 2.71E+01 | 1.39E+01 | 0.91  |
|    | 1344.23 | 0.0112   | 0.1785 | 48.5086   | 7.24E-03 | 3.96E-03 |       |
| 8  | 1381.34 | 66.6215  | 0.3174 | 2.00E-04  | 2.92E+01 | 3.75E+01 | 0.6   |
|    | 1381.94 | 1.00E-04 | 0.3173 | 104.0669  | 4.38E-05 | 5.62E-05 |       |
| 10 | 1403.34 | 7.3265   | 0.3767 | 0.2781    | 2.65E+00 | 4.68E+00 | 0.17  |
|    | 1403.51 | 0.0781   | 0.3748 | 26.6514   | 2.84E-02 | 4.97E-02 |       |
| 11 | 1442.26 | 0.0481   | 0.6354 | 18.4542   | 4.49E-03 | 4.36E-02 | 0.74  |
|    | 1443.00 | 12.5603  | 0.6553 | 0.0667    | 9.58E-01 | 1.16E+01 |       |
|    | 1448.26 | 19.1952  | 0.7268 | 0.0047    | 3.44E-01 | 1.89E+01 | 2.07  |
|    | 1450.33 | 6.00E-04 | 0.5754 | 64.1562   | 8.87E-05 | 5.11E-04 |       |
|    | 1460.56 | 0.3834   | 0.6365 | 43.9284   | 3.55E-02 | 3.48E-01 | 0.22  |
|    | 1460.78 | 4.6026   | 0.6370 | 3.6822    | 4.24E-01 | 4.18E+00 |       |
|    | 1483.43 | 19.0966  | 0.7423 | 6.00E-04  | 1.13E-01 | 1.90E+01 | 1.79  |
|    | 1485.22 | 4.00E-04 | 0.7145 | 73.2413   | 1.10E-05 | 3.89E-04 |       |
|    | 1493.40 | 9.2985   | 0.7386 | 0.0016    | 8.13E-02 | 9.22E+00 | 2.08  |
|    | 1495.48 | 0.001    | 0.6964 | 196.0858  | 4.21E-05 | 9.58E-04 |       |
| 12 | 1499.50 | 23.6664  | 0.6329 | 0.0041    | 2.26E+00 | 2.14E+01 | 1.25  |
|    | 1500.75 | 0.0013   | 0.6717 | 7.3412    | 8.12E-05 | 1.22E-03 |       |
|    | 1504.34 | 12.4963  | 0.7202 | 0.0034    | 2.89E-01 | 1.22E+01 | 1.03  |
|    | 1505.37 | 7.00E-04 | 0.5965 | 55.4525   | 8.97E-05 | 6.10E-04 |       |
|    | 1526.19 | 0.0108   | 0.7472 | 19.0465   | 2.31E-05 | 1.08E-02 | 1.18  |
|    | 1527.37 | 11.377   | 0.7124 | 0.0083    | 3.33E-01 | 1.10E+01 |       |
|    | 1528.89 | 17.6976  | 0.6973 | 0.2003    | 7.33E-01 | 1.70E+01 | 0.09  |
|    | 1528.98 | 0.7697   | 0.6915 | 4.2033    | 3.55E-02 | 7.34E-01 |       |
|    | 1535.81 | 11.3904  | 0.545  | 5.00E-04  | 2.02E+00 | 9.38E+00 | 0.94  |
|    | 1536.75 | 4.00E-04 | 0.4249 | 22.1886   | 1.22E-04 | 2.78E-04 |       |
| 13 | 1568.03 | 6.318    | 0.4233 | 0.0017    | 1.93E+00 | 4.38E+00 | 2.42  |
|    | 1570.45 | 1.00E-04 | 0.3653 | 191.0331  | 3.76E-05 | 6.24E-05 |       |
| 14 | 1609.58 | 51.5534  | 0.2236 | 0.0014    | 2.96E+01 | 2.20E+01 | 1.5   |
|    | 1611.08 | 7.00E-04 | 0.2182 | 99.3652   | 4.07E-04 | 2.93E-04 |       |
| 15 | 1690.21 | 20.4047  | 0.2424 | 0         | 1.11E+01 | 9.29E+00 | 11.96 |
|    | 1702.17 | 0        | 0.3731 | 1258.9381 | 0.00E+00 | /        |       |
| 16 | 1734.85 | 68.3424  | 0.0957 | 0         | 5.44E+01 | 1.39E+01 | 6.61  |
|    | 1741.46 | 0        | 0.4038 | 659.9526  | 0.00E+00 | /        |       |

*PARALLEL DIMER*

|   | <b>Wavenumbers<br/>cm<sup>-1</sup></b> | <b>S<sub>tot</sub></b> | <b>ρ</b> | <b>IR</b> | <b>S<sub>iso</sub></b> | <b>S<sub>aniso</sub></b> | <b>Splitting<br/>cm<sup>-1</sup></b> |
|---|----------------------------------------|------------------------|----------|-----------|------------------------|--------------------------|--------------------------------------|
| 1 | 1034.57                                | 0.4868                 | 0.7499   | 47.7733   | 3.71E-05               | 0.48676                  | 0.88                                 |
|   | 1035.45                                | 4.626                  | 0.3158   | 55.835    | 2.03537                | 2.59063                  |                                      |
| 2 | 1076.94                                | 0.8067                 | 0.7436   | 0.6518    | 0.00395                | 0.80275                  | 0.07                                 |
|   | 1077.01                                | 2.5061                 | 0.2616   | 0.0019    | 1.29357                | 1.21253                  |                                      |
| 3 | 1208.09                                | 2.0256                 | 0.75     | 17.2671   | 0                      | 2.0256                   | 0.97                                 |
|   | 1209.06                                | 0.6247                 | 0.3766   | 5.9735    | 0.22593                | 0.39877                  |                                      |
| 4 | 1256.39                                | 0.0155                 | 0.7489   | 42.66     | 1.30E-05               | 0.01549                  | 0.4                                  |
|   | 1256.79                                | 15.4552                | 0.4708   | 71.3785   | 3.91179                | 11.54341                 |                                      |
| 5 | 1267.33                                | 0.7442                 | 0.75     | 37.2218   | 0                      | 0.7442                   | 1.33                                 |
|   | 1268.66                                | 16.6562                | 0.3364   | 0.4313    | 6.8732                 | 9.783                    |                                      |

|    |         |         |        |          |          |          |      |
|----|---------|---------|--------|----------|----------|----------|------|
| 6  | 1288.89 | 18.1037 | 0.5742 | 15.2625  | 2.69566  | 15.40804 | 1.37 |
|    | 1290.26 | 0.578   | 0.75   | 17.3144  | 0        | 0.578    |      |
| 7  | 1341.94 | 3.0414  | 0.75   | 13.3251  | 0        | 3.0414   | 2.32 |
|    | 1344.26 | 38.0231 | 0.1388 | 33.5536  | 27.2096  | 10.8135  |      |
| 8  | 1378.21 | 11.4889 | 0.75   | 0.5565   | 0        | 11.4889  | 0.59 |
|    | 1378.80 | 41.9762 | 0.2367 | 102.2146 | 23.22998 | 18.74622 |      |
| 10 | 1402.40 | 1.8796  | 0.7499 | 28.6897  | 1.43E-04 | 1.87946  | 0.22 |
|    | 1402.62 | 5.4693  | 0.1015 | 0.1192   | 4.29335  | 1.17595  |      |
| 11 | 1444.99 | 3.7594  | 0.5418 | 4.0665   | 0.67688  | 3.08252  | 2.32 |
|    | 1447.31 | 10.9511 | 0.75   | 35.2543  | 0        | 10.9511  |      |
|    | 1451.16 | 9.7854  | 0.7042 | 32.8778  | 0.35064  | 9.43476  | 1.87 |
|    | 1453.03 | 6.2253  | 0.75   | 25.9289  | 0        | 6.2253   |      |
|    | 1463.27 | 3.9092  | 0.6579 | 18.8976  | 0.28955  | 3.61965  | 0.56 |
|    | 1463.83 | 0.4247  | 0.75   | 30.2057  | 0        | 0.4247   |      |
|    | 1483.81 | 9.3358  | 0.75   | 36.5184  | 0        | 9.3358   | 0.13 |
|    | 1483.94 | 12.342  | 0.7389 | 41.1461  | 0.10504  | 12.23696 |      |
|    | 1495.12 | 0.0794  | 0.75   | 21.2622  | 0        | 0.0794   | 1.87 |
|    | 1496.99 | 9.8393  | 0.745  | 114.1199 | 0.03759  | 9.80171  |      |
| 12 | 1502.71 | 0.8069  | 0.75   | 5.4309   | 0        | 0.8069   | 0.05 |
|    | 1502.76 | 24.7913 | 0.6605 | 10.1488  | 1.78165  | 23.00965 |      |
|    | 1506.01 | 4.2024  | 0.7122 | 55.2327  | 0.1237   | 4.0787   | 0.3  |
|    | 1506.31 | 6.3247  | 0.75   | 17.4477  | 0        | 6.3247   |      |
|    | 1524.20 | 1.1801  | 0.75   | 7.0392   | 0        | 1.1801   | 2.61 |
|    | 1526.81 | 0.7356  | 0.592  | 10.4238  | 0.09734  | 0.63826  |      |
|    | 1529.20 | 15.8082 | 0.6992 | 0.015    | 0.63014  | 15.17806 | 0.37 |
|    | 1529.57 | 14.3007 | 0.75   | 15.8769  | 0        | 14.3007  |      |
|    | 1532.87 | 1.1577  | 0.75   | 19.1794  | 0        | 1.1577   | 1.89 |
|    | 1534.76 | 2.5194  | 0.2894 | 0.1213   | 1.19997  | 1.31943  |      |
| 13 | 1567.75 | 4.2925  | 0.75   | 5.1671   | 0        | 4.2925   | 2.62 |
|    | 1570.37 | 0.9873  | 0.0331 | 209.5587 | 0.91349  | 0.07381  |      |
| 14 | 1612.83 | 48.977  | 0.1939 | 25.4804  | 30.41696 | 18.56004 | 0.84 |
|    | 1613.67 | 1.7514  | 0.7498 | 98.1697  | 2.67E-04 | 1.75113  |      |
| 15 | 1696.59 | 38.8071 | 0.1315 | 116.9169 | 28.28363 | 10.52347 | 9.58 |
|    | 1706.17 | 4.0306  | 0.75   | 1089.862 | 0        | 4.0306   |      |
| 16 | 1742.52 | 2.0942  | 0.75   | 65.673   | 0        | 2.0942   | 3.96 |
|    | 1746.48 | 48.5317 | 0.0803 | 603.7575 | 40.11439 | 8.41731  |      |

**Figure S5** Arrhenius temperature dependence of the reorientational relaxation time, the estimated activation energy  $E_a$  gives a value of 2.0 kcal mol<sup>-1</sup> ( $\pm 0.4$  kcal mol<sup>-1</sup>).

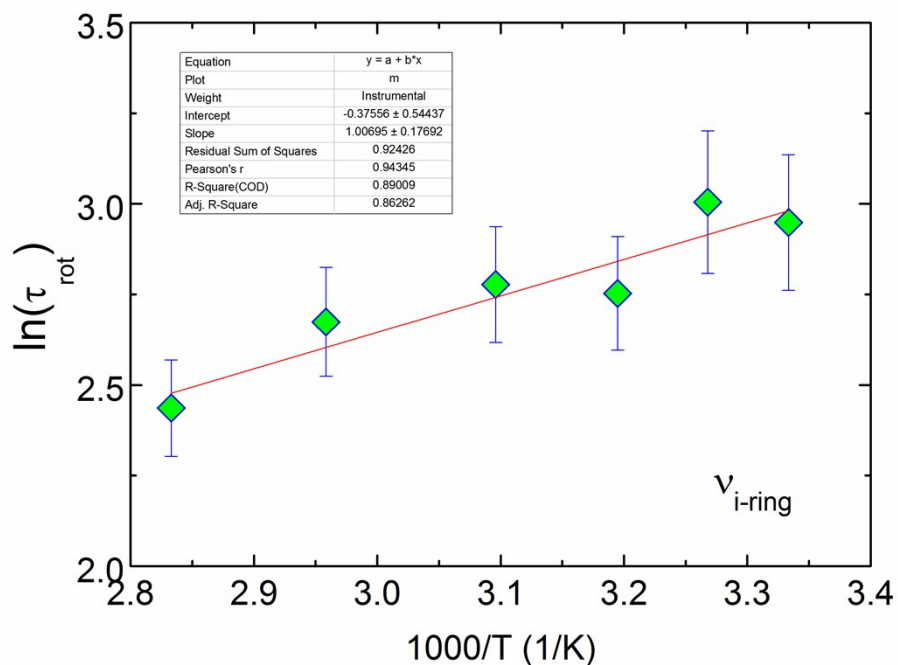

**Figure S6** Correlation between the reorientational time and the non-coincidence effect associated to the vibrational normal mode involving the caffeine methyl groups bending.

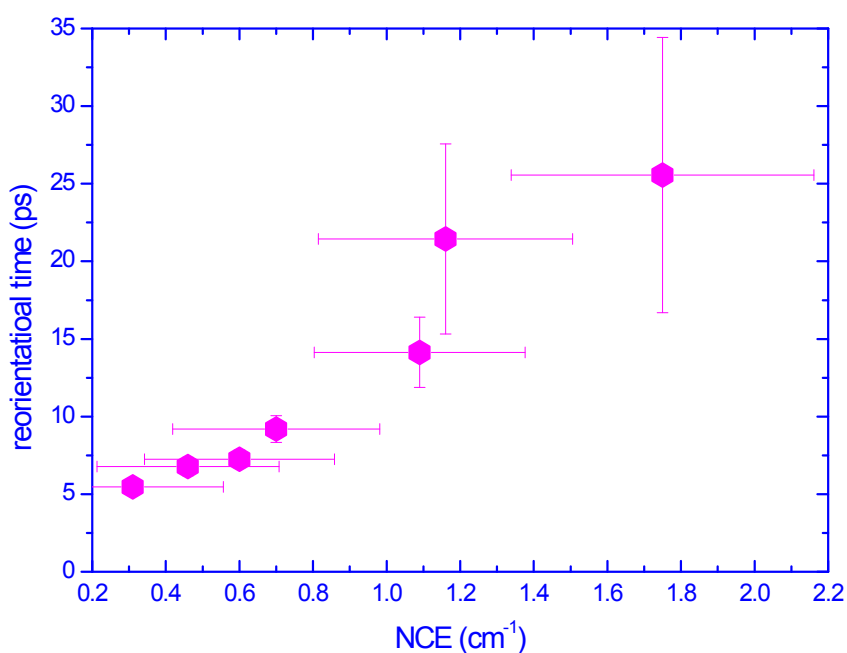

## References

1. V. Krishnakumar, G. Keresztury, T. Sundius and R. Ramasamy, *Journal of Molecular Structure*, 2004, **702**, 9-21.
2. L. Mariani, A. Morresi, R. S. Cataliotti and M. G. Giorgini, *The Journal of Chemical Physics*, 1996, **104**, 914-922.
3. W. G. Rothschild, *The Journal of Chemical Physics*, 1976, **65**, 455-462.
4. I. A. Heisler, K. Mazur, S. Yamaguchi, K. Tominaga, S. R. Meech, *Physical Chemistry Chemical Physics* 2011, **13**, 15573-15579.
